# Supplementary material for: Bio-inspired chitosan-heme-vitamin B12-derived Fe–Co bimetallic-doped mesoporous carbons for efficiently electro-activating oxygen
Source: Royal Society of Chemistry journal article supplement (doi:10.1039/c8dt04279a), 2018-12-27

## Supporting information

### **Bioinspired Chitosan-Heme-Vitamin B<sub>12</sub>-Derived Fe-Co Bimetallic-Doped Mesoporous Carbons for Efficiently Electro-activating Oxygen**

Zifan Ma,<sup>b†</sup> Longdi Xu,<sup>a†</sup> Lu yao Liu,<sup>a</sup> Luyao Wang,<sup>a</sup> Xiaoying Zhang,<sup>a</sup> and Aiguo Kong<sup>a\*</sup>

Figure S1 The calibration curves of the potential vs Ag/AgCl in 0.1 M KOH (A) and in 0.1 M HClO<sub>4</sub> (B)

Figure S2 Raman spectrum of Fe(1)-Co(3)-N-C-900

Figure S3 TEM EDS mapping images of Fe(1)-Co(3)-N-C-900

Figure S4 RDE polarization curves of Fe(1)-Co(3)-N-C-900 in 0.1 M KOH(A) and in 0.1 M HClO<sub>4</sub> (B) at different rotating speeds.

Figure S5 RRDE curves of Fe(1)-Co(3)-N-C-900 in 0.1 M KOH (A) and in 0.1 M HClO<sub>4</sub> (B). The corresponding electron transfer numbers determined by RRDE curves between 0.1 and 0.6 V in 0.1 M KOH (C) and in 0.1 M HClO<sub>4</sub> (D).

Figure S6 The methanol-tolerance property of Fe(1)-Co(3)-N-C-900 in 0.1 M KOH

Figure S1

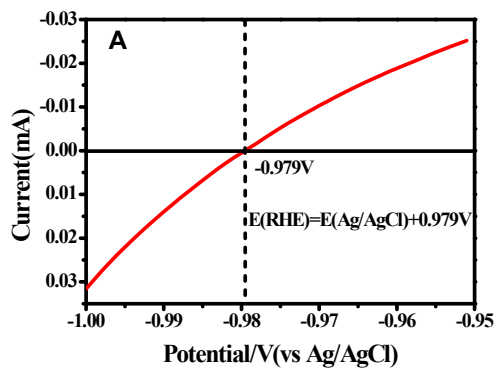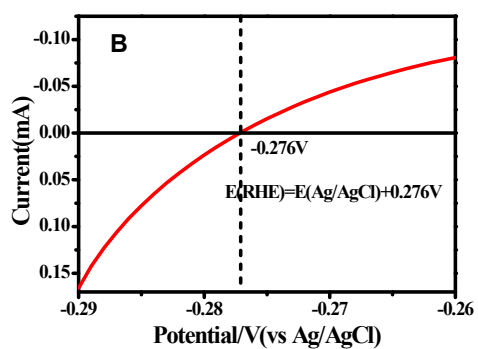

Figure S2

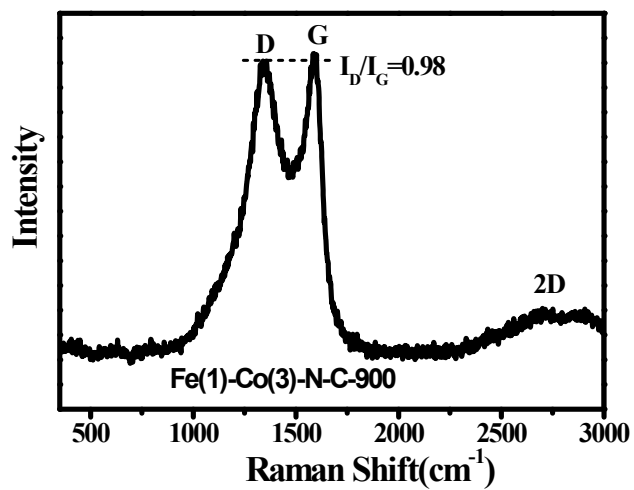

Figure S3

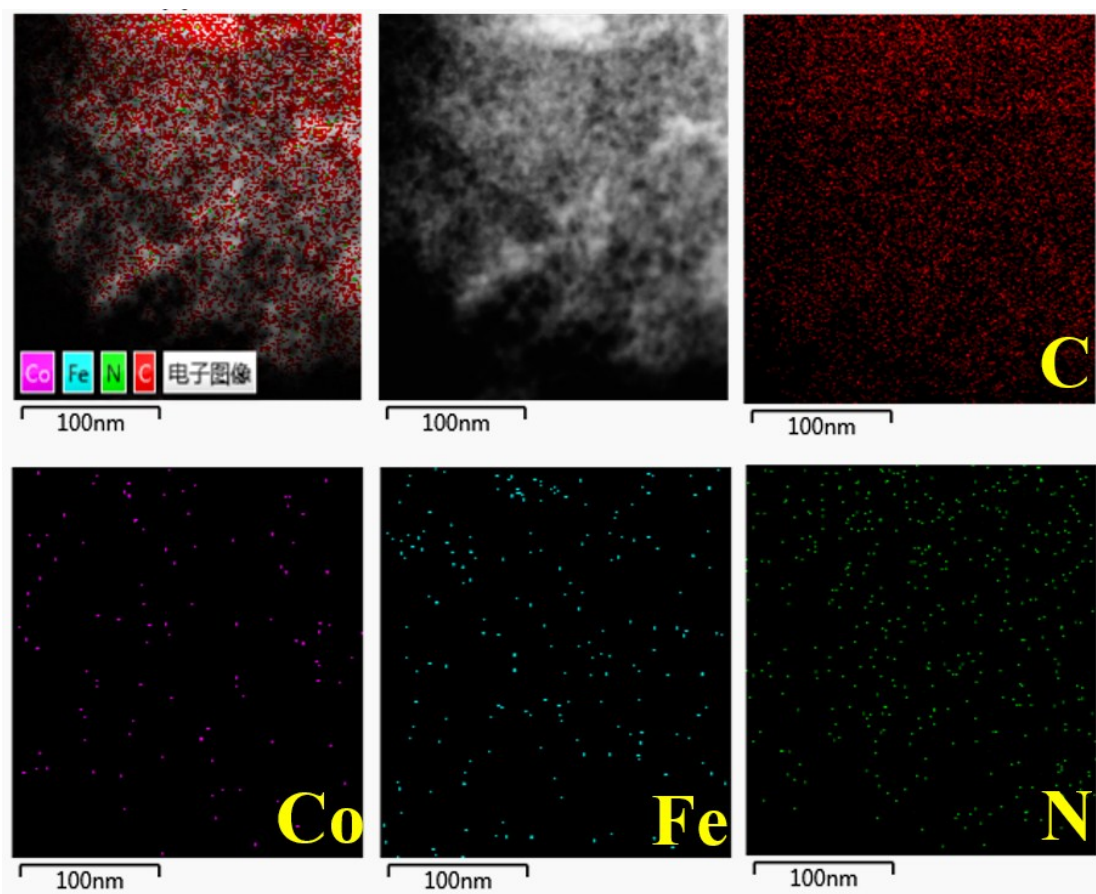

Figure S4

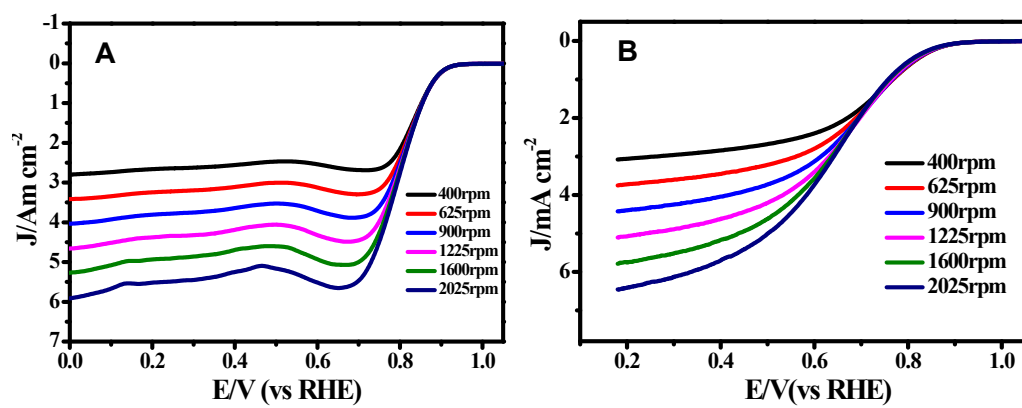

Figure S5

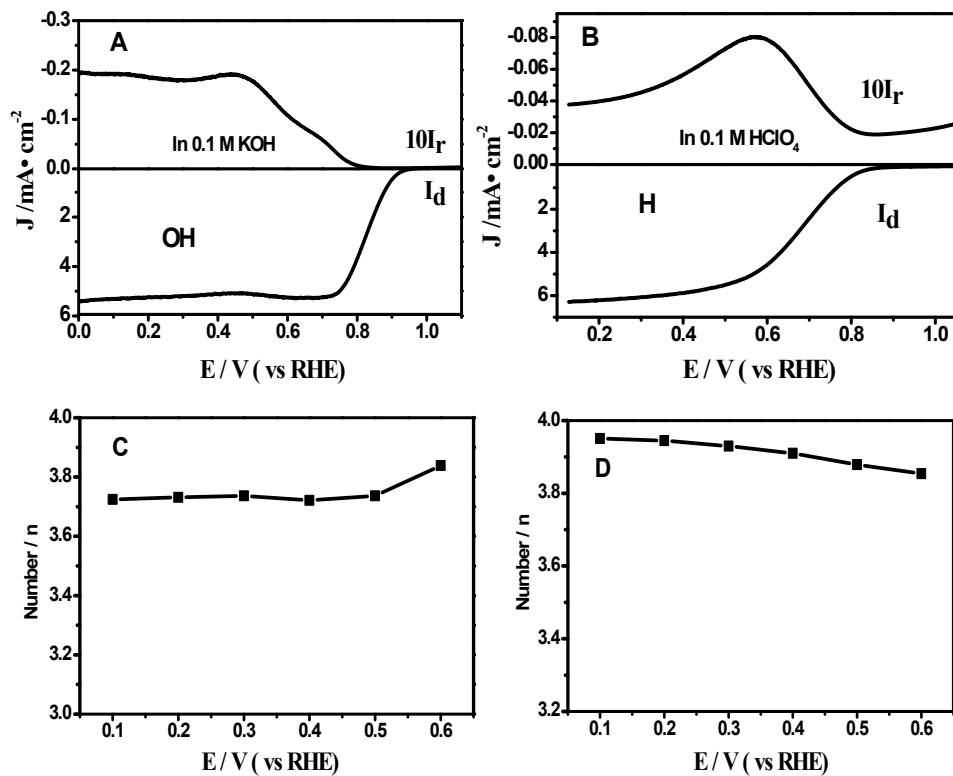

Figure S6

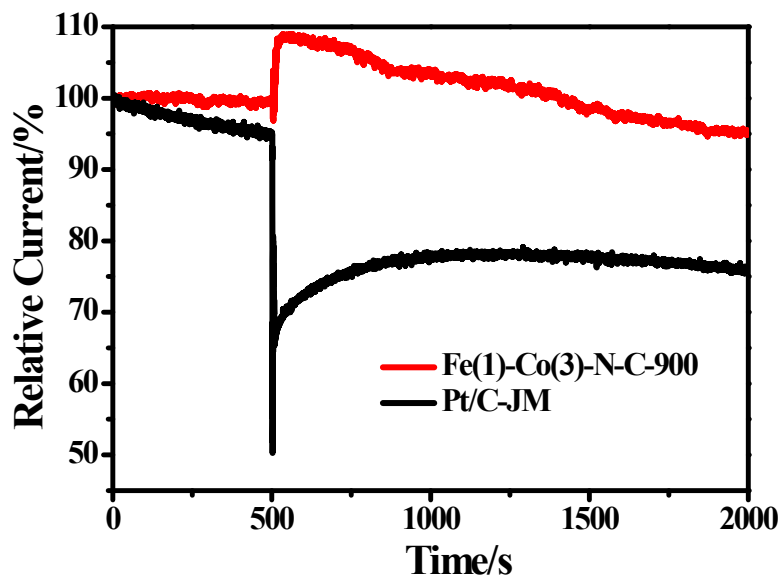

Supplement: c8dt04279a1.pdf [file c8dt04279a1.pdf]
